# Supplementary material
Source: publisher figshare collection journal article supplement (https://sage.figshare.com/ndownloader/files/22692671)
Supplement: Supplementary file 1 [file 22692671]

**Supplementary Figure 1.** Reasons given for discontinuation during each year of natalizumab treatment.

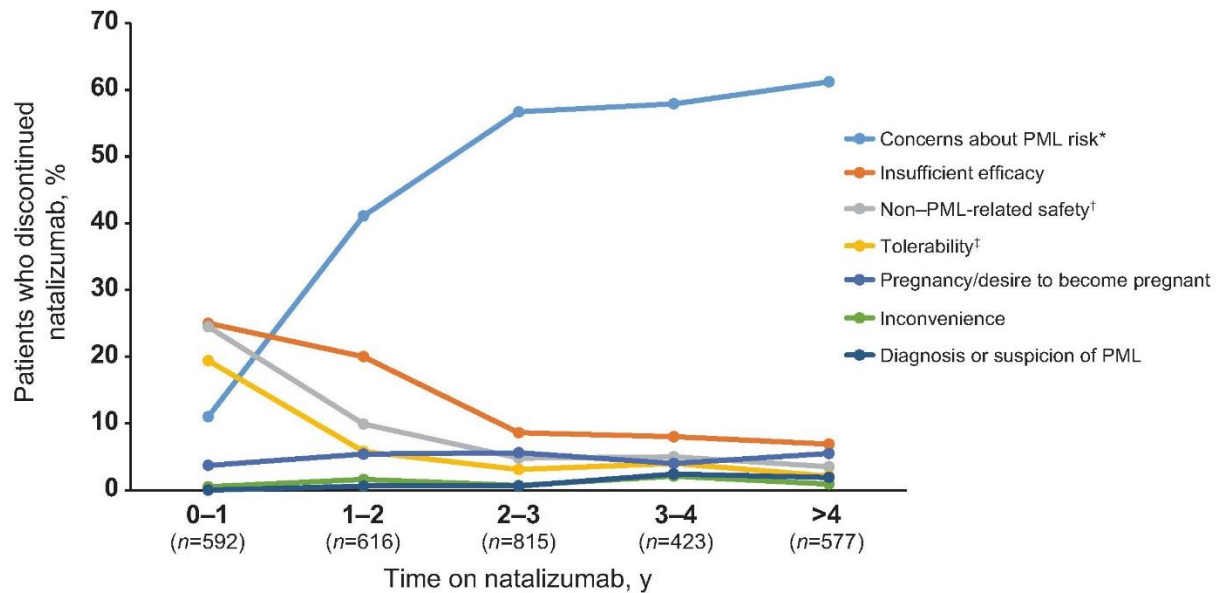

PML: progressive multifocal leukoencephalopathy.

\*Includes the terms “anti-JCV [JC virus] antibody positive,” “natalizumab treatment duration concern,” “PML risk,” and “prior IS [immunosuppressant] use.”

†Includes the terms “non-serious adverse event,” “serious/other serious adverse event,” “safety concern,” “malignancy/cancer,” “death,” “opportunistic infection,” and “other serious infection.”

‡Includes the terms “tolerability problem” and “natalizumab antibody positive.”
